# Supplementary material for: Treating with Epidermal Growth Factor Receptor (EGFR) Tyrosine Kinase Inhibitors (TKIs) Accompanying Lower Incidence of Second Primary Cancers
Source: MDPI journal article supplement (doi:10.3390/jcm11175222), 2022-09-04
Supplement: s1 [file s1]

Table S1. Univariate and multivariate Cox proportional hazard models in the overall study population.

| Characteristics                       |          | Univariate analysis | Overall |                       |        |
|---------------------------------------|----------|---------------------|---------|-----------------------|--------|
|                                       |          |                     | P       | Multivariate analysis | P      |
| History of smoking                    | No (ref) | 1                   |         | 1                     |        |
|                                       | Yes      | 1.16 (1.07–1.27)    | <0.001  | 1.11 (1.02–1.21)      | <0.001 |
|                                       | Unknown  | 1.59 (1.43–1.76)    |         | 1.50 (1.35–1.67)      |        |
| EGFR                                  | No (ref) | 1                   |         | 1                     |        |
|                                       | Yes      | 0.81 (0.71–0.92)    | <0.001  | 0.98 (0.85–1.12)      | <0.001 |
|                                       | Unknown  | 1.32 (1.17–1.48)    |         | 1.21 (1.08–1.36)      |        |
| TKI                                   |          | 0.11 (0.08–0.15)    | <0.001  | 0.12 (0.09–0.16)      | <0.001 |
| EGFR, epidermal growth factor recepto |          |                     |         |                       |        |

Table S2. Univariate and multivariate Cox proportional hazard models in the overall study population after adjusting for all variables.

| Characteristics                  |              | Univariate analysis | Overall |                       |        |
|----------------------------------|--------------|---------------------|---------|-----------------------|--------|
|                                  |              |                     | P       | Multivariate analysis | P      |
| Age                              | <65 (ref)    | 1                   |         | 1                     |        |
|                                  | ≥65          | 1.21 (1.12–1.30)    | <0.001  | 1.01 (0.93–1.09)      | 0.812  |
| Sex                              | Female (ref) | 1                   |         | 1                     |        |
|                                  | Male         | 1.22 (1.14–1.32)    | <0.001  | 1.139 (1.04–1.25)     | 0.006  |
| History of smoking               | No (ref)     | 1                   |         | 1                     |        |
|                                  | Yes          | 1.16 (1.07–1.27)    | <0.001  | 0.99 (0.88–1.11)      | 0.357  |
|                                  | Unknown      | 1.59 (1.43–1.76)    |         | 0.82 (0.62–1.08)      |        |
| History of alcohol consumption   | No (ref)     | 1                   |         | 1                     |        |
|                                  | Yes          | 1.13 (1.02–1.26)    | <0.001  | 1.09 (0.972–1.23)     | 0.222  |
|                                  | Unknown      | 1.53 (1.39–1.68)    |         | 1.14 (0.91–1.421)     |        |
| EGFR                             | No (ref)     | 1                   |         | 1                     |        |
|                                  | Yes          | 0.81 (0.71–0.92)    | <0.001  | 0.97 (0.85–1.12)      | 0.192  |
|                                  | Unknown      | 1.32 (1.17–1.48)    |         | 1.07 (0.95–1.22)      |        |
| Stage of lung cancer             | 0            | 2.04 (1.68–2.48)    |         | 1.72 (1.41–2.09)      |        |
|                                  | 1            | 1                   |         | 1                     |        |
|                                  | 2            | 1.21 (1.05–1.39)    | <0.001  | 1.27 (1.10–1.47)      | <0.001 |
|                                  | 3            | 0.98 (0.87–1.10)    |         | 0.98 (0.86–1.11)      |        |
|                                  | 4            | 0.79 (0.71–0.87)    |         | 0.80 (0.71–0.91)      |        |
| Histological type of lung cancer | Unknown      | 1.74 (1.55–1.96)    |         | 1.55 (1.31–1.82)      |        |
|                                  | AC (ref)     | 1                   |         | 1                     |        |
|                                  | SCC          | 1.32 (1.17–1.49)    | <0.001  | 1.06 (0.93–1.22)      | <0.001 |
|                                  | Small cell   | 2.16 (1.85–2.52)    |         | 2.14 (1.81–2.53)      |        |

|                   |              |                  |        |                  |        |
|-------------------|--------------|------------------|--------|------------------|--------|
|                   | Others       | 1.62 (1.41–1.85) |        | 1.03 (0.90–1.19) |        |
|                   | Under weight | 1.00 (0.88–1.13) |        | 0.98 (0.86–1.11) |        |
| BMI               | Normal       | 1                | <0.001 | 1                | 0.584  |
|                   | Oberg weight | 0.95 (0.87–1.04) |        | 0.94 (0.86–1.03) |        |
|                   | Unknown      | 1.45 (1.32–1.61) |        | 1.02 (0.85–1.23) |        |
| Hypertension      |              | 1.34 (1.18–1.52) | <0.001 | 1.31 (1.15–1.50) | <0.001 |
| Diabetes mellitus |              | 1.18 (1.08–1.29) | <0.001 | 1.12 (1.02–1.23) | 0.024  |
| Hyperlipidemia    |              | 1.06 (0.98–1.15) | 0.145  | 1.03 (0.95–1.12) | 0.471  |
| CHF               |              | 1.07 (0.92–1.24) | 0.385  | 0.85 (0.72–1.00) | 0.045  |
| Stroke            |              | 1.10 (0.96–1.25) | 0.157  | 0.97 (0.85–1.11) | 0.641  |
| Gout              |              | 1.21 (1.08–1.37) | 0.002  | 1.09 (0.96–1.23) | 0.168  |
| COPD              |              | 1.07 (0.99–1.16) | 0.078  | 1.00 (0.92–1.08) | 0.946  |
| Operation         |              | 0.47 (0.43–0.51) | <0.001 | 0.35 (0.32–0.39) | <0.001 |
| Chemotherapy      |              | 0.18 (0.14–0.22) | <0.001 | 0.23 (0.18–0.29) | <0.001 |
| Radiotherapy      |              | 0.19 (0.16–0.23) | <0.001 | 0.22 (0.18–0.26) | <0.001 |
| TKI               |              | 0.11 (0.08–0.15) | <0.001 | 0.15 (0.11–0.21) | <0.001 |

AC, adenocarcinoma; SCC, squamous cell carcinoma; SD, standard deviation; BMI, body mass index; EGFR, epidermal growth factor receptor; DM, diabetes mellitus; CHF, congestive heart failure; COPD, chronic obstructive pulmonary disease.

---
